# Supplementary material for: A porcine commotio retinae model for preclinical evaluation of posttraumatic photoreceptor degeneration
Source: JCI journal article supplement (doi:10.1172/jci.insight.192799), 2026-01-13
Supplement: sd2 [file 2]

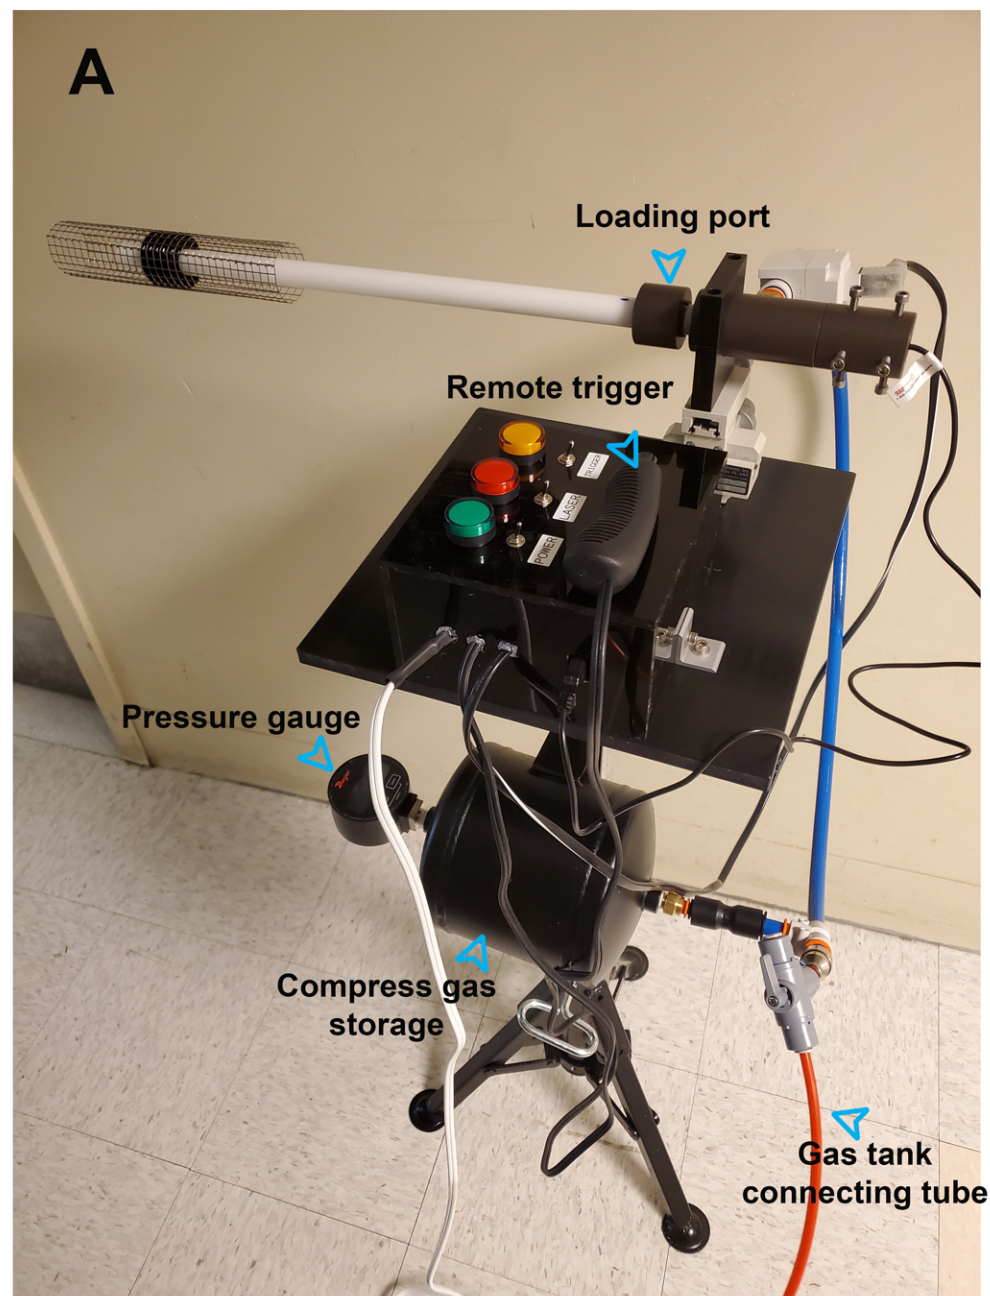

**B**

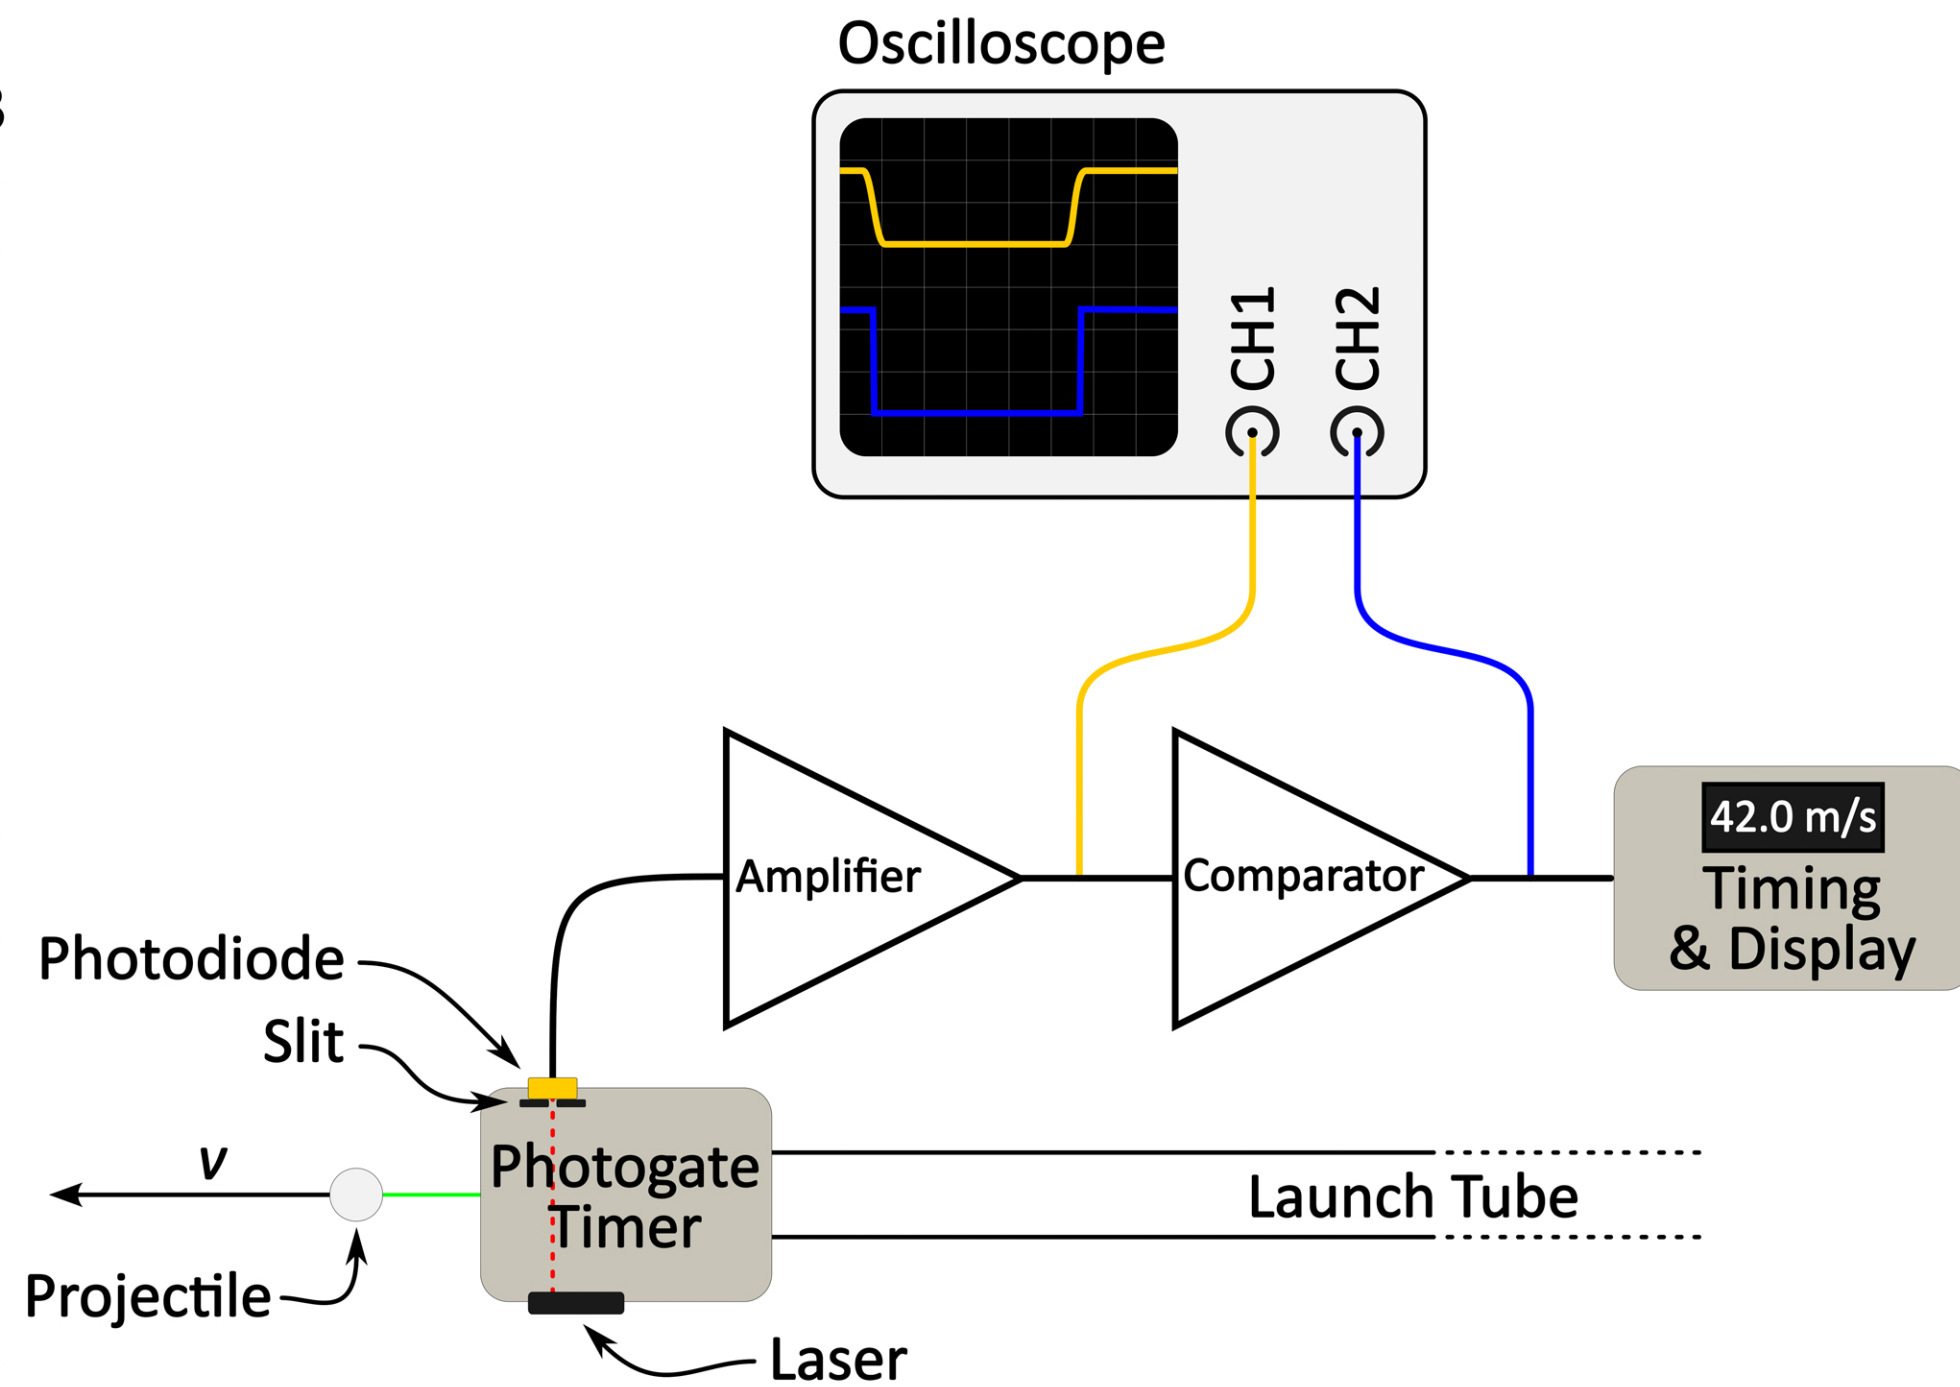

**Supplemental Fig. 1. Pressure application device (PAD) functioning. (A)** Photograph of the PAD device. **(B)** Circuit for projectile speed measurement showing the laser beam that traverses the projectile launch tube and the narrow slit that masks the photodiode. The photodiode is connected to a high bandwidth transimpedance amplifier, comparator, and microcontroller circuit. The analog and digital signals are simultaneously monitored with an oscilloscope to verify accuracy of microcontroller timing measurements.

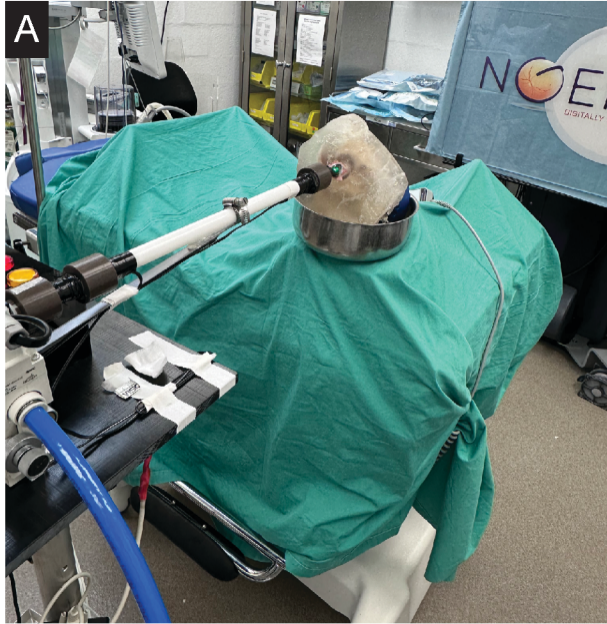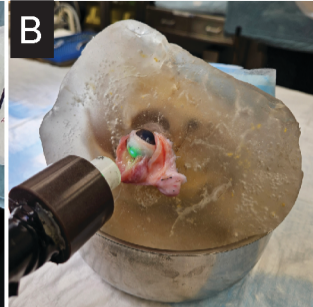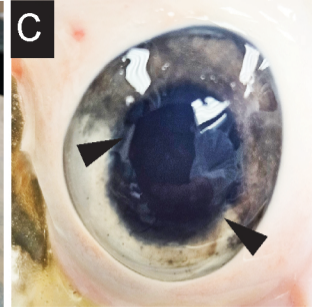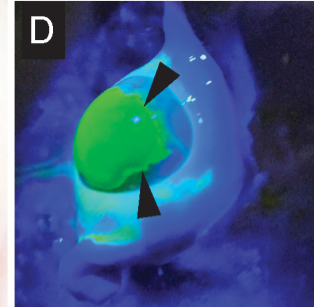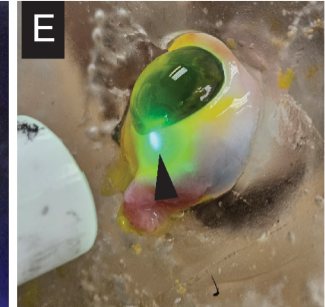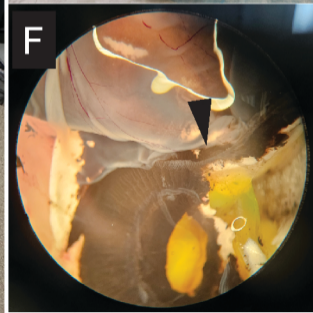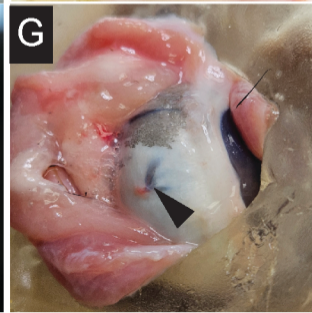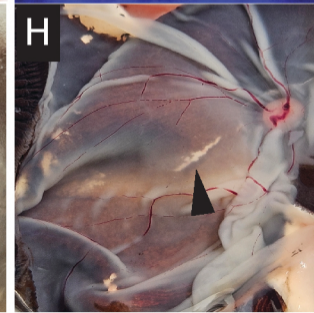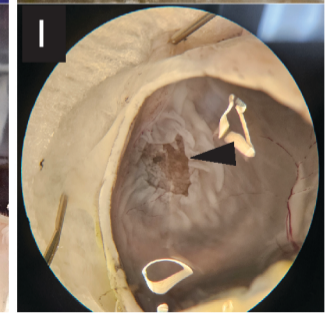

**Supplementary Fig. 2. Ex vivo PAD evaluation.** (A, B) Room set up (A) and higher magnification view (B) showing PAD aimed at a cadaveric pig eye in a 3D printed pig skull filled with the ballistic gel®. (C) Arrow heads point to epithelial displacement in the cornea highlighting corneal damage after a direct projectile impact. (D) Fluorescein dye stains damaged corneal cells (arrow heads) after a direct projectile impact. (E) Fluorescein dye stains peripheral epithelial corneal defects (arrowhead) after limbal impact of the projectile. (F) Arrowhead points to limbal impacts associated retinal dialysis. (G-I) Scleral impact at 48.14 m/s induced extensive scleral damage (G, arrow), and rupture in the choroid (H, arrow) and the retina (I, arrow).

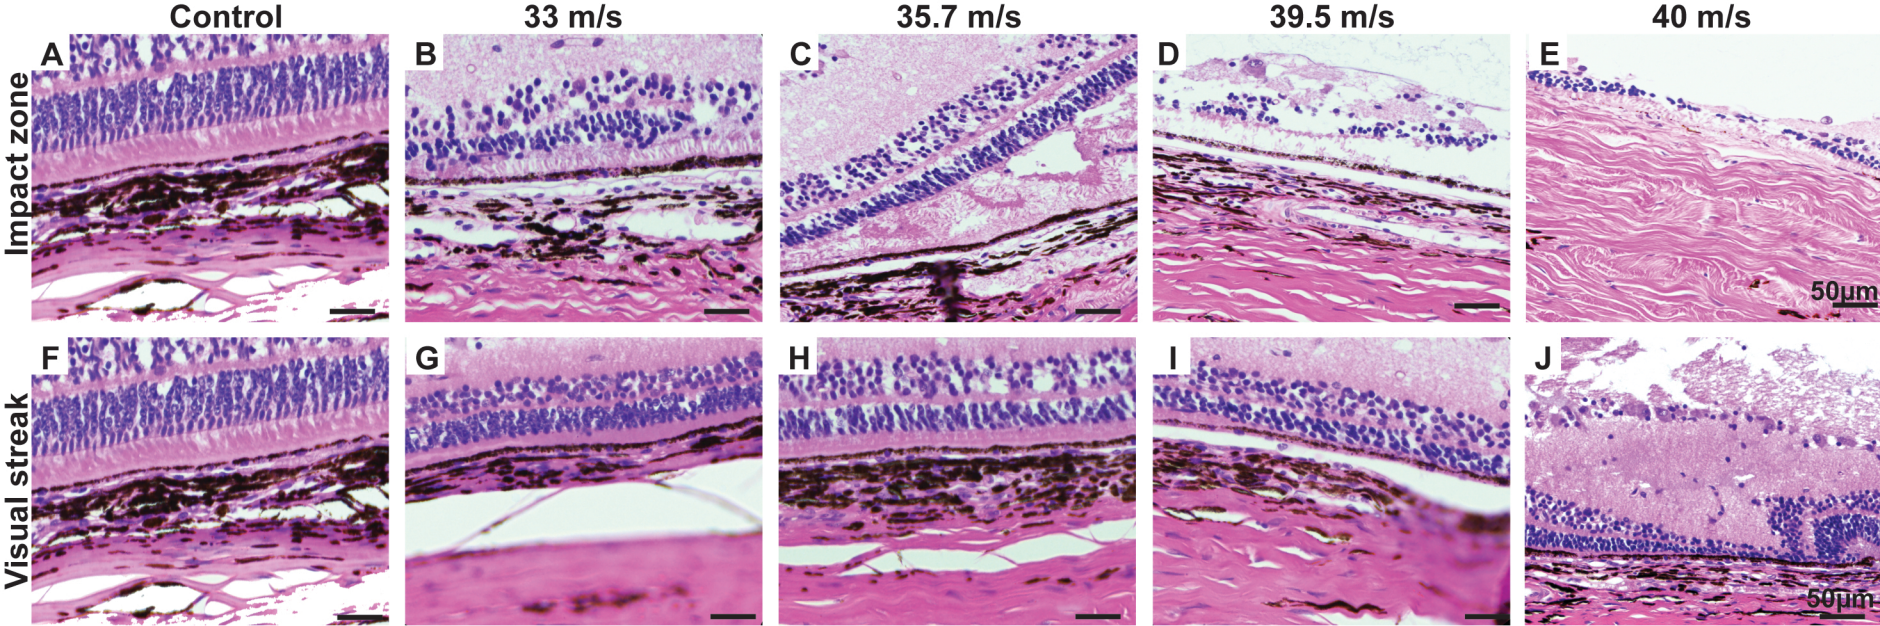

**Supplemental Fig. 3. Projectile speed optimization for the scleral impact.** H&E stained images showing the extent of damage in the impact zone (**A-E**), and the visual streak (**F-J**) and eyes hit with projectiles at different velocities – 15 PSI – 33 m/s (**B, G**), 17 PSI – 35.7 m/s (**C, H**), 19 PSI – 39.5 m/s (**D, I**), and 25 PSI – 48m/s (**E, J**).

**A**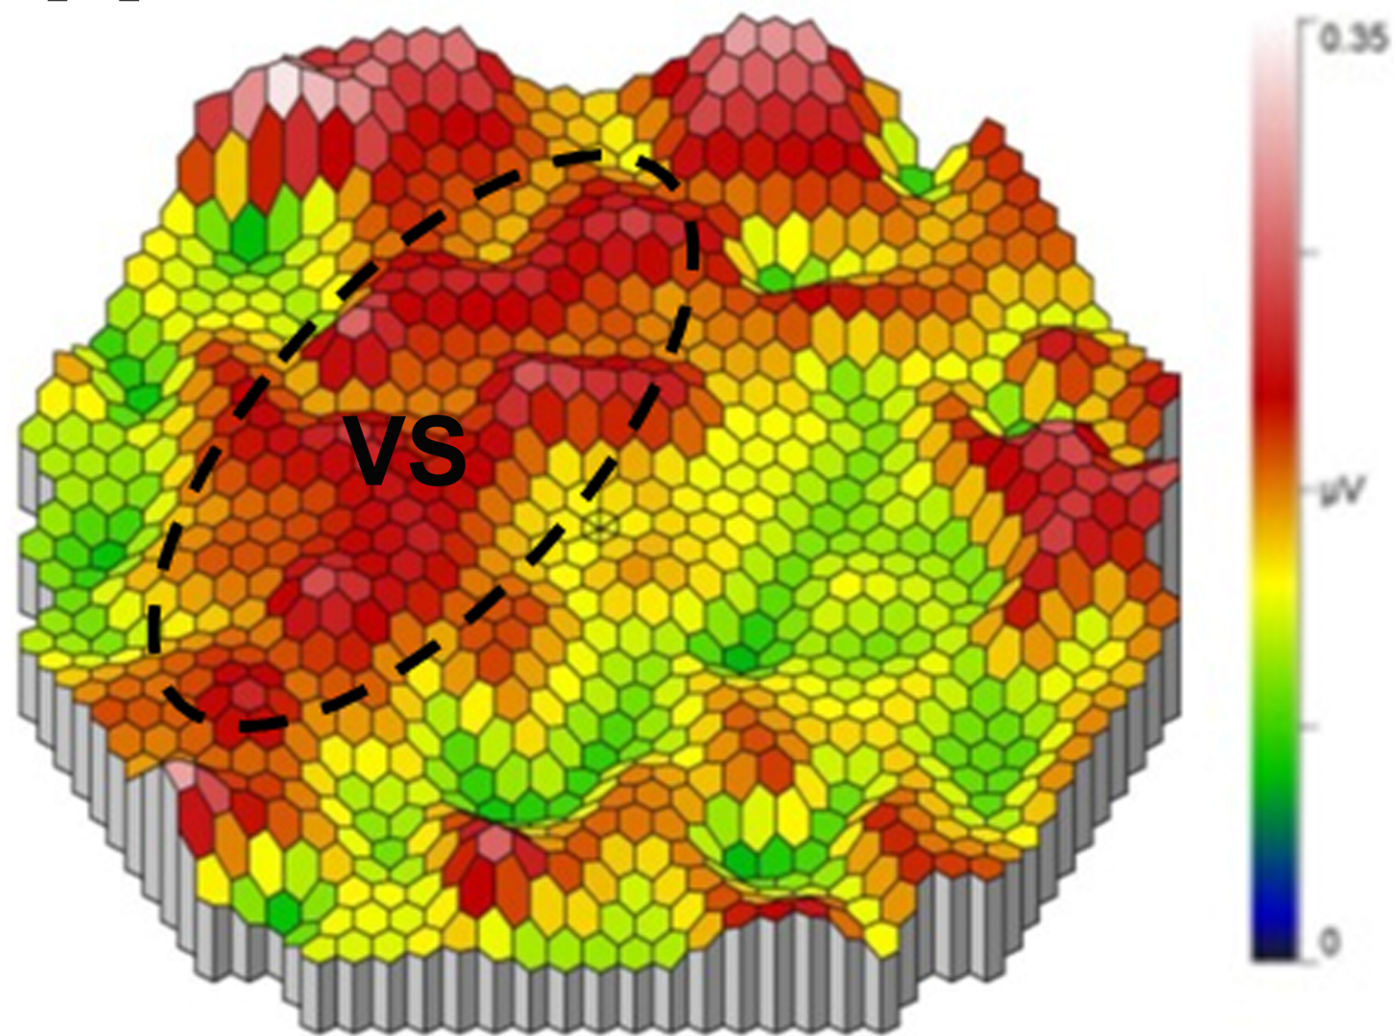**B**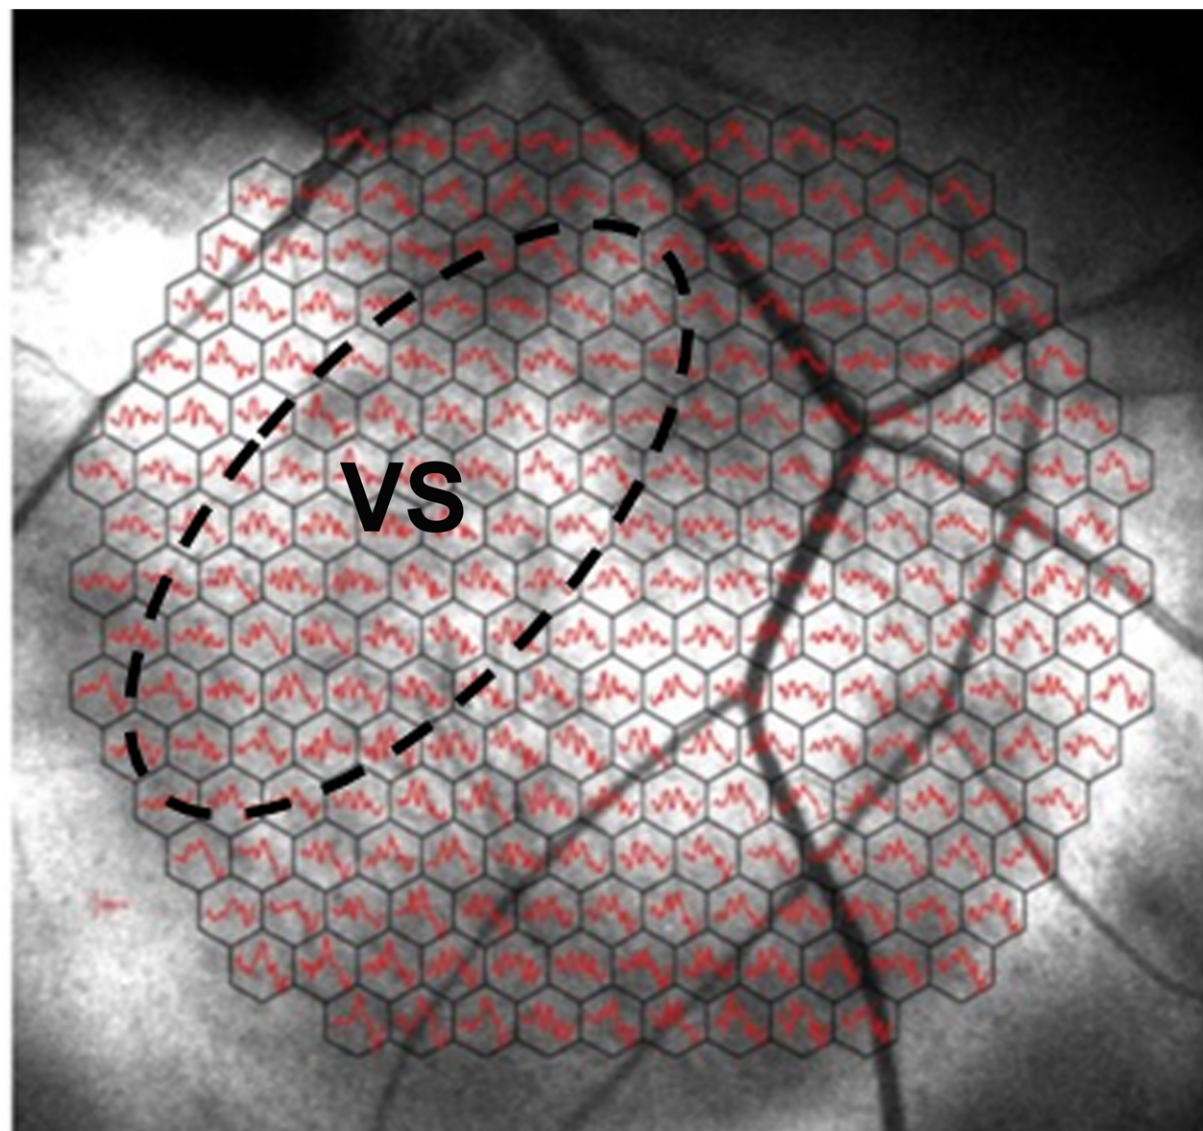

**Supplemental Fig. 4. mfERG protocol.** (A) 3D heat map of peak 1 (P1) amplitudes and infrared fundus image (B) showing the location where light stimuli were projected on the retina. Average mfERG signal obtained per hexagon is shown. Higher amplitude peaks (represented in red and orange in the left panel) correlate with the high concentration of cones in the visual streak (VS) area (marked by dotted oval in both panels).

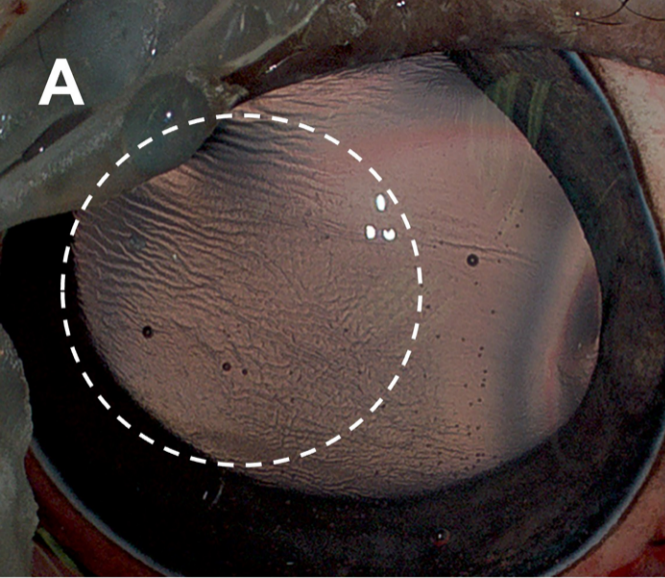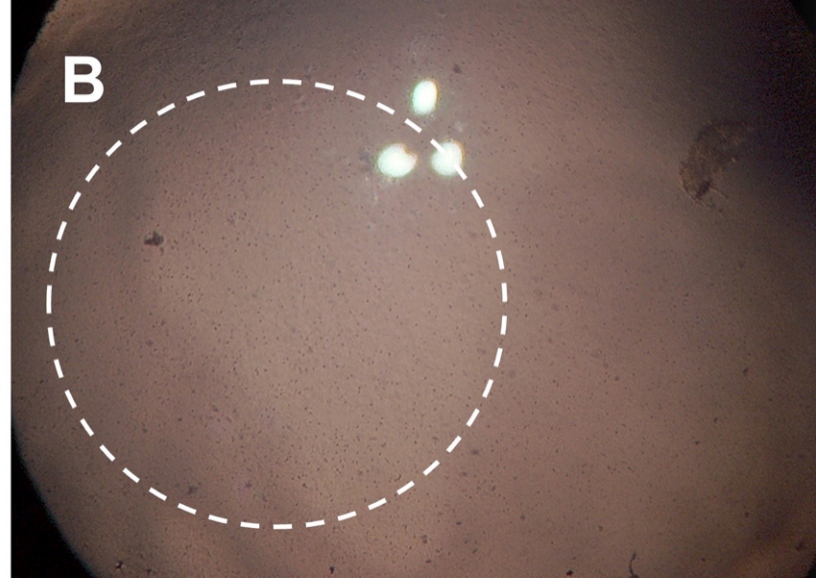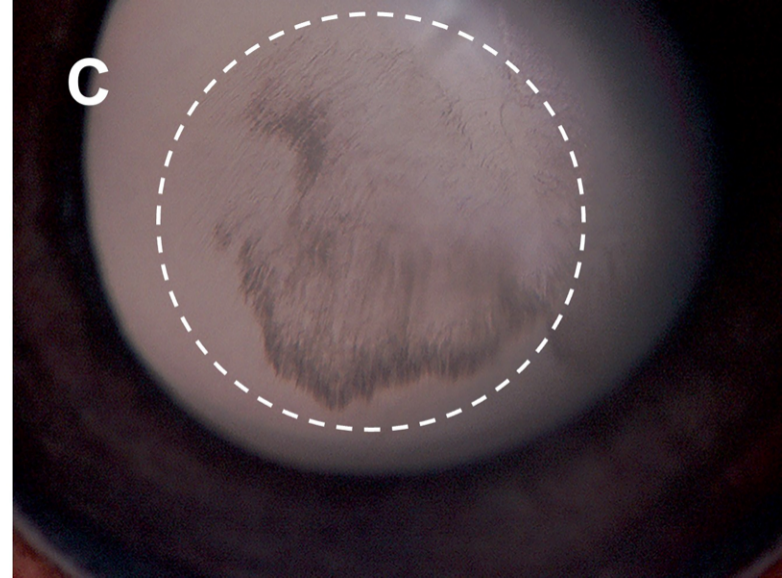

**Supplementary Fig. 5. Anterior segment changes after the scleral impact.** Examples of corneal folds (circle) **(A)**; anterior chamber cells (circle) **(B)**; posterior capsule tattoo (circle) secondary to pigment dispersion after impact shock wave **(C)**.

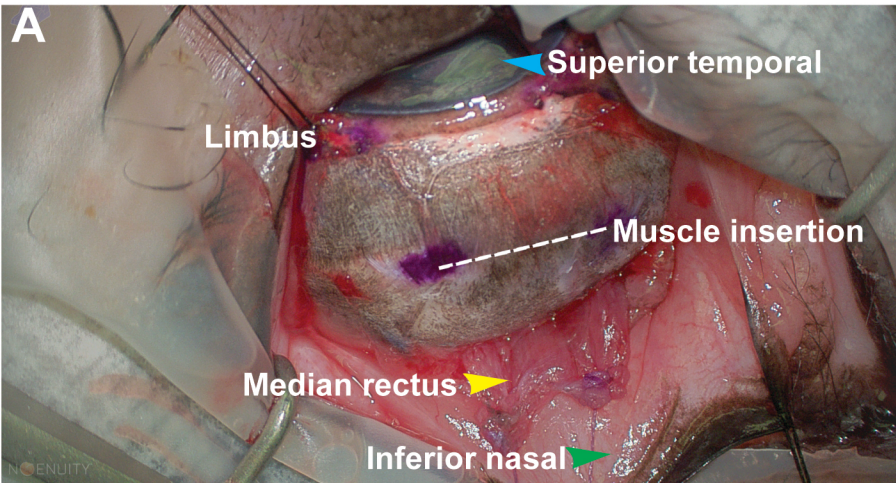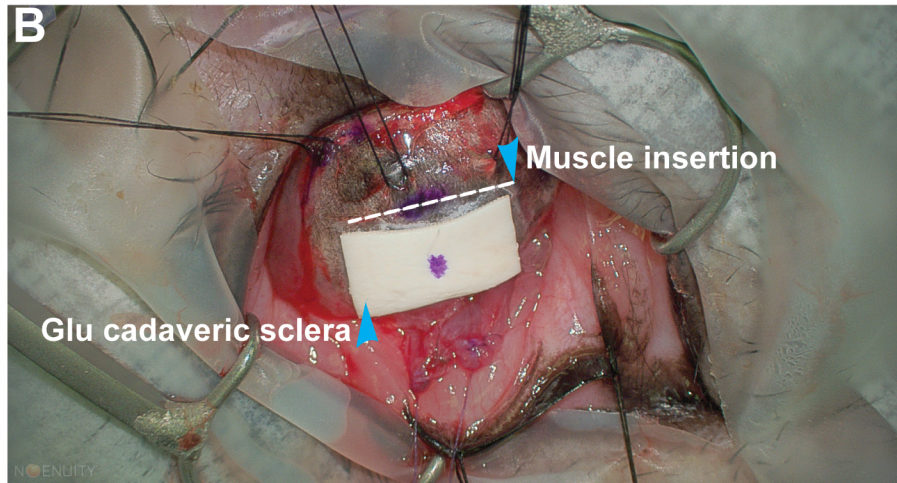

**Supplementary Fig. 6. Surgical technique for nasal scleral impact using the cadaveric scleral patch.** **(A)** Exposed nasal sclera after retracted conjunctiva. The area between superior temporal (blue arrow) and inferior nasal (green arrow) is the nasal sclera. Dotted line shows cut median rectus muscle and yellow arrow shows the retracted muscle. **(B)** Cadaveric human scleral patch (marked by blue arrowheads) is temporally glued to the nasal sclera below median rectus insertion (dotted lines) and impact location is marked (purple dot).

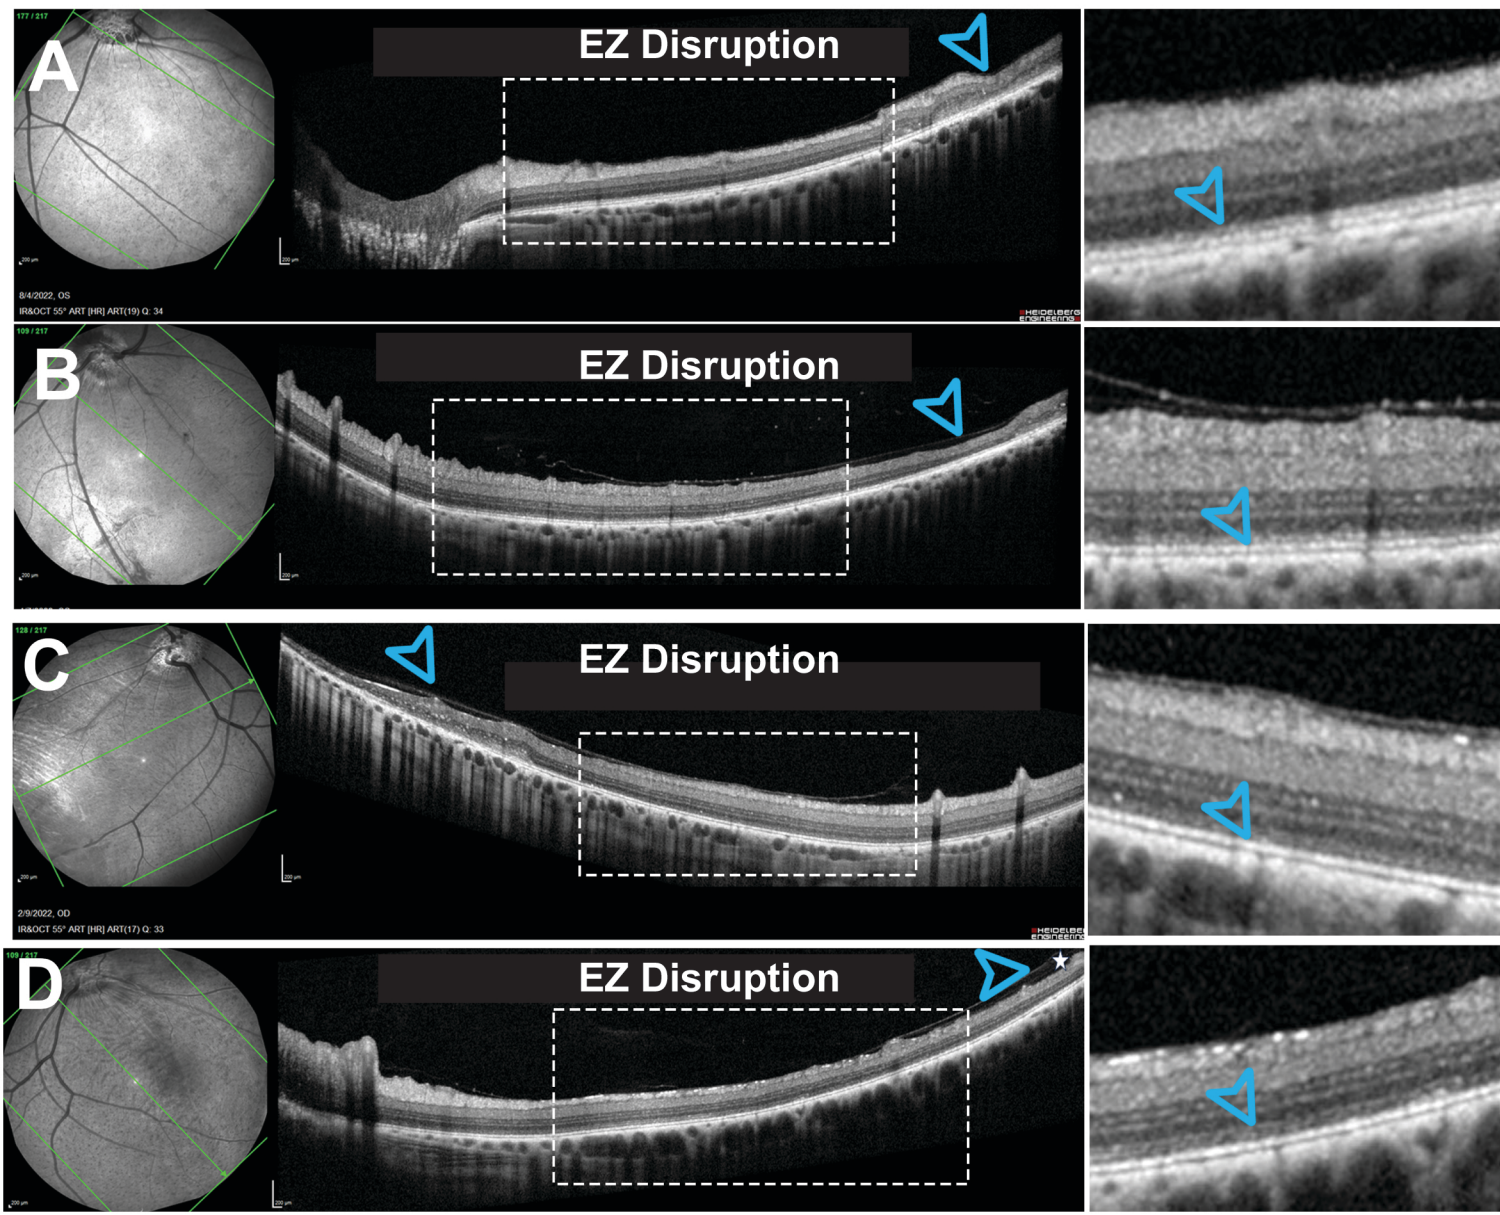

**Supplementary Fig. 7. Reproducible visual streak damage using the scleral patch (A-D)**

Left panels: lower magnification OCT evaluation at the terminal timepoint before enucleation show impact area (arrowhead) and ellipsoid zone (EZ) disruption (rectangles). Right panels: higher magnification OCT images confirm the absence of the ellipsoid zone (arrowhead).

|                    |                     |                            |                 | Damage extent CR area |         |     |        |        | Damage extent VS area |         |     |          |
|--------------------|---------------------|----------------------------|-----------------|-----------------------|---------|-----|--------|--------|-----------------------|---------|-----|----------|
| Number of eyes (n) | Pressure used (PSI) | Calculated Velocity (Vm/s) | Impact location | Sclera                | Choroid | RPE | Retina | Cornea | Sclera                | Choroid | RPE | Retina   |
| 3                  | 20                  | 40.5                       | Cornea          | -                     | -       | ++  | +++    | +++    | -                     | -       | +   | +++      |
| 3                  | 20                  | 40.5                       | Limbus          | -                     | -       | -   | -      | +++    | -                     | -       | -   | Dialysis |
| 3                  | 15                  | 33                         | Sclera          | -                     | -       | -   | +      | -      | -                     | -       | -   | +        |
| 3                  | 17                  | 37.5                       | Sclera          | -                     | -       | -   | ++     | -      | -                     | -       | -   | +        |
| 3                  | 19                  | 39.5                       | Sclear          | -                     | +       | +   | ++     | -      | -                     | -       | -   | ++       |
| 3                  | 25                  | 48                         | Sclear          | -                     | +++     | +++ | +++    | -      | -                     | +       | ++  | +++      |

**Key:** - No damage, + Minimal damage, ++ Medium damage, +++ Significant damage
